# Supplementary material
Source: Springer Nature journal article supplement (https://www.springermedizin.de/resource/supplementary/12974_2011_438_MOESM12_ESM.pdf/9601288)

BDNF 400 ng/ml (min)

0

10

40

(A)

Control

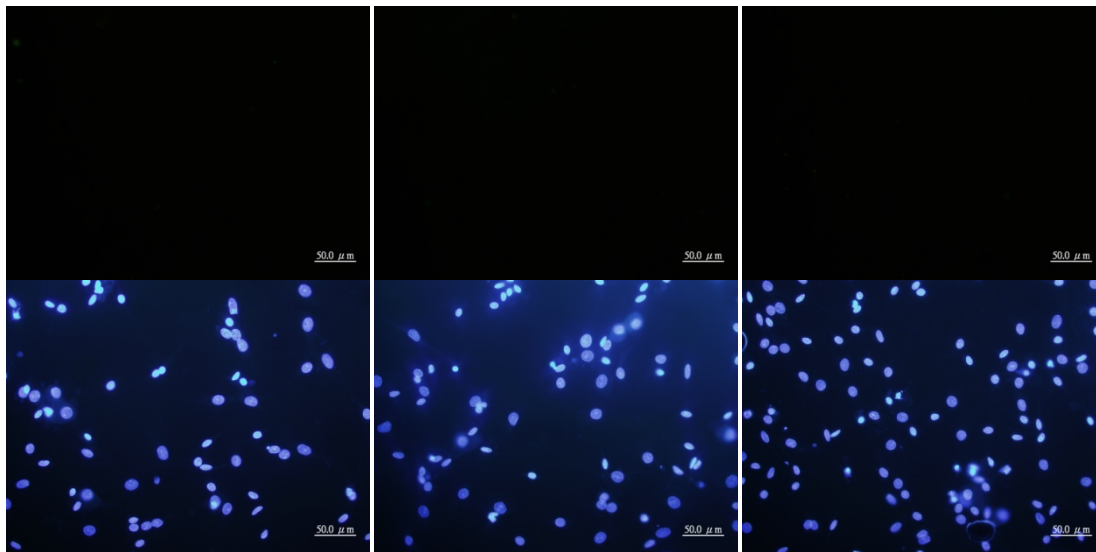

Negative control

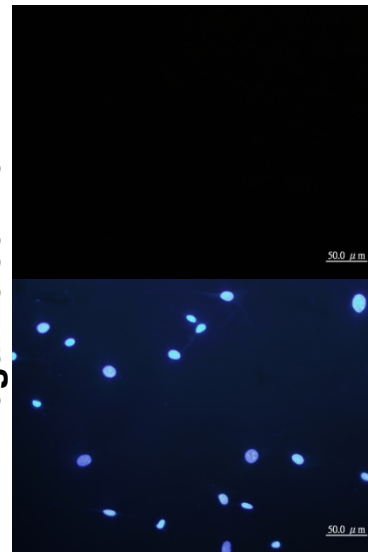

(B)

TNF- $\alpha$

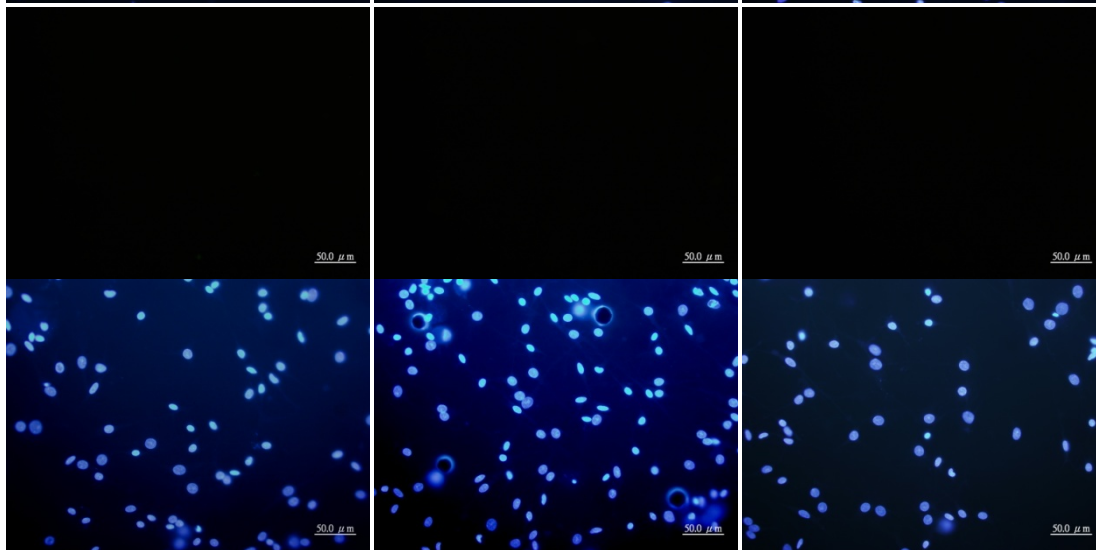

Positive control

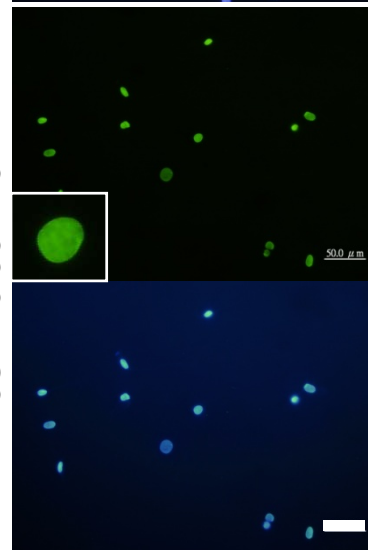

Supplement: MOESM12 [file 9601288]
